# Supplementary material for: A Versatile in Vivo DNA Assembly Toolbox for Fungal Strain Engineering
Source: PubMed Central journal article supplement (PMC9594312; doi:10.1021/acssynbio.2c00159), 2022-09-20
Supplement: sb2c00159_si_001.pdf [file sb2c00159_si_001.pdf]

# Supplementary Information

## **A versatile in vivo DNA assembly toolbox for fungal strain engineering**

Zofia Dorota Jarczynska<sup>1,†</sup>, Katherina Garcia Vanegas<sup>1,†</sup>, Marcus Deichmann<sup>1</sup>, Christina Nørskov Jensen<sup>1</sup>, Marouschka Jasmijn Scheeper<sup>1</sup>, Malgorzata Ewa Futyma<sup>1</sup>, Tomas Strucko<sup>1</sup>, Fabiano Jares Contesini<sup>1</sup>, Tue Sparholt Jørgensen<sup>2</sup>, Jakob Blæsbjerg Hoof<sup>1</sup>, Uffe Hasbro Mortensen<sup>1,\*</sup>

<sup>1</sup>Eukaryotic Molecular Cell Biology, Section for Synthetic Biology, Department of Biotechnology and Biomedicine, Technical University of Denmark, Kongens Lyngby, Denmark

<sup>2</sup>The Novo Nordisk Foundation Center for Biosustainability, Technical University of Denmark, Kongens Lyngby, Denmark

<sup>†</sup>Joint authors

\*Corresponding author, [um@bio.dtu.dk](mailto:um@bio.dtu.dk)

The Supplementary Information contains 10 figures and 3 tables.

**Figures:**

**Supplementary Figure S1** Construction of plasmid pAC1767.

**Supplementary Figure S2** Gap repair of plasmid pAC1767 in the presence of a DNA repair fragment with 25 bp overlapping sequences to the plasmid ends.

**Supplementary Figure S3** Plasmid construction by *in vivo* assembly.

**Supplementary Figure S4** Southern blot analysis of *A. nidulans* strains harboring pAMA1-*mRFP*.

**Supplementary Figure S5** *E. coli* cloning-free gene deletion mediated by *in vivo* assembly.

**Supplementary Figure S6** Marker-free chromosomal integration of a *mCitrine*-GEC cassette by *in vivo* assembly.

**Supplementary Figure S7** Marker-free chromosomal integration of a *mRFP*-GEC cassette by *in vivo* assembly.

**Supplementary Figure S8** Southern blots of GEC insertion strains generated by *in vivo* assembly.

**Supplementary Figure S9** Validation of the tRNA::sgRNA::HDV setup for sgRNA release.

**Supplementary Figure S10** Cloning- and marker-free gene deletion by *in vivo* assembly.

**Tables:**

**Supplementary Table S1** Vectors used in this study.

**Supplementary Table S2** Strains used in this study.

**Supplementary Table S3** List of primers used in this study.

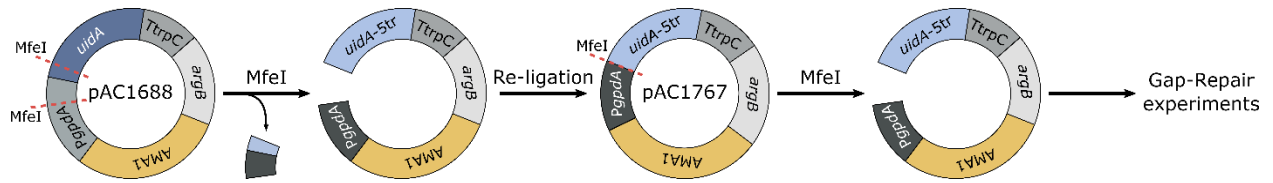

**Supplementary Figure S1** Construction of plasmid pAC1767. To prepare the vector for gap-repair experiments, pAC1688 was treated with *MfeI*. This resulted in excision of a fragment containing the 3'-part of the promoter and the start of the *uidA* gene. The resulting vector backbone was purified from agarose gel and re-ligated by T4 DNA ligase to give pAC1767 with one functional *MfeI* site and a non-functional *uidA* gene. After propagation of pAC1767, it was digested with *MfeI* to produce a completely linearized vector applicable for gap repair experiments.

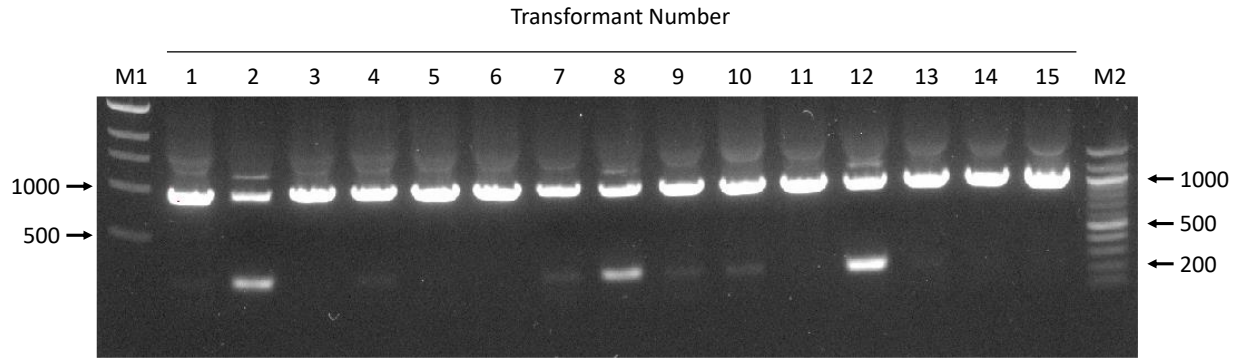

**Supplementary Figure S2** Gap repair of plasmid pAC1767 in the presence of a DNA repair fragment with 25 bp overlapping sequences to the plasmid ends. 15 blue transformants were analyzed for the presence of the insert by diagnostic PCR using genomic DNA from the individual transformants as template. Repair mediated by the DNA repair fragment produces a band of 1 kb and simple plasmid religation produces a band of 200 bp. M1 and M2 represent 1 kb and 100 bp markers, respectively.

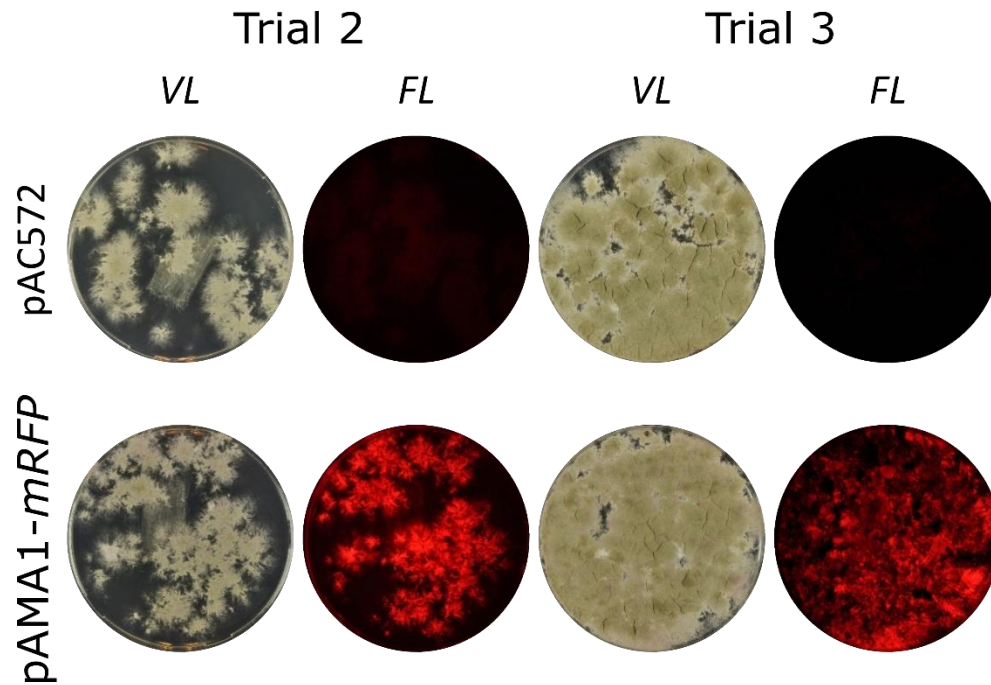

**Supplementary Figure S3** Plasmid construction by *in vivo* assembly. Transformation of the NHEJ deficient *A. nidulans* strain NID2695 with pAC572, an AMA1-*pyrG* control vector, or with the six PCR fragments required for the *in vivo* assembly of pAMA1-*mRFP*, trial 2 and 3. For details, see main text. Transformation plates were imaged at visible light (VL) and in a setup detecting red fluorescence (FL).

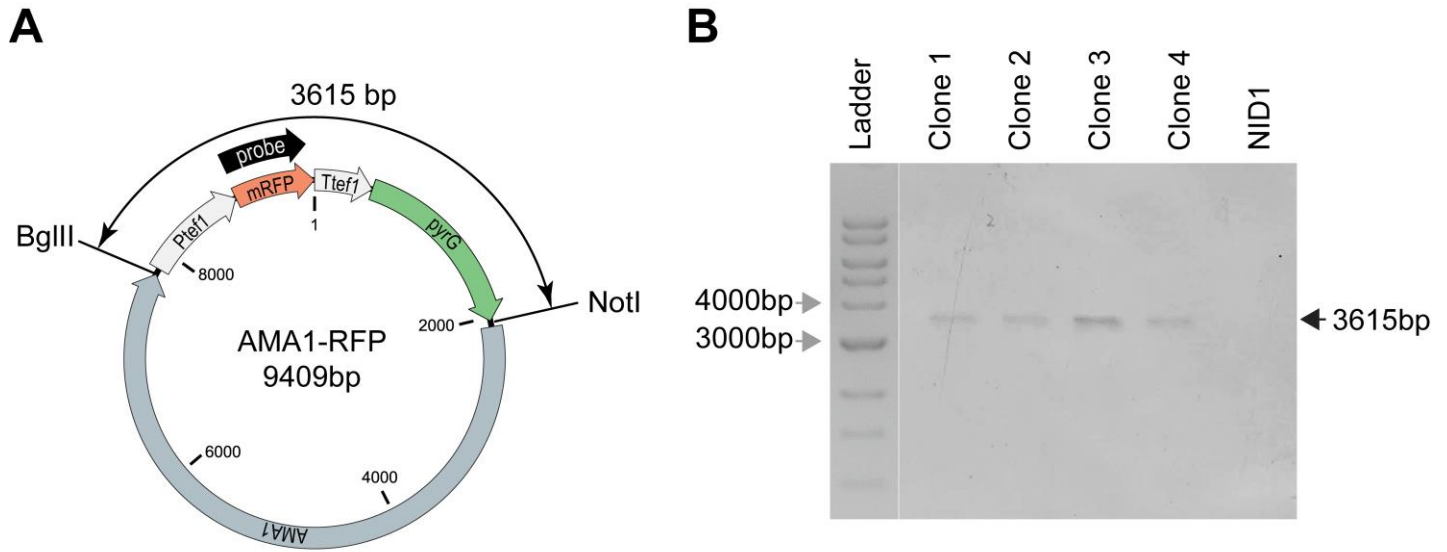

**Supplementary Figure S4** Southern blot analysis of *A. nidulans* strains harboring pAMA1-*mRFP*. **(A)** Extracted genomic DNA was digested with BglIII and NotI restriction enzymes liberating a band of 3615 bp if the vector was correctly assembled. **(B)** Samples were loaded in the following order: 1 kb ladder, four different purified transformants (clones 1-4) randomly selected from the transformation plate, and the control strain NID1 (no plasmid). All the transformants showed the correct band size for proper plasmid assembly.

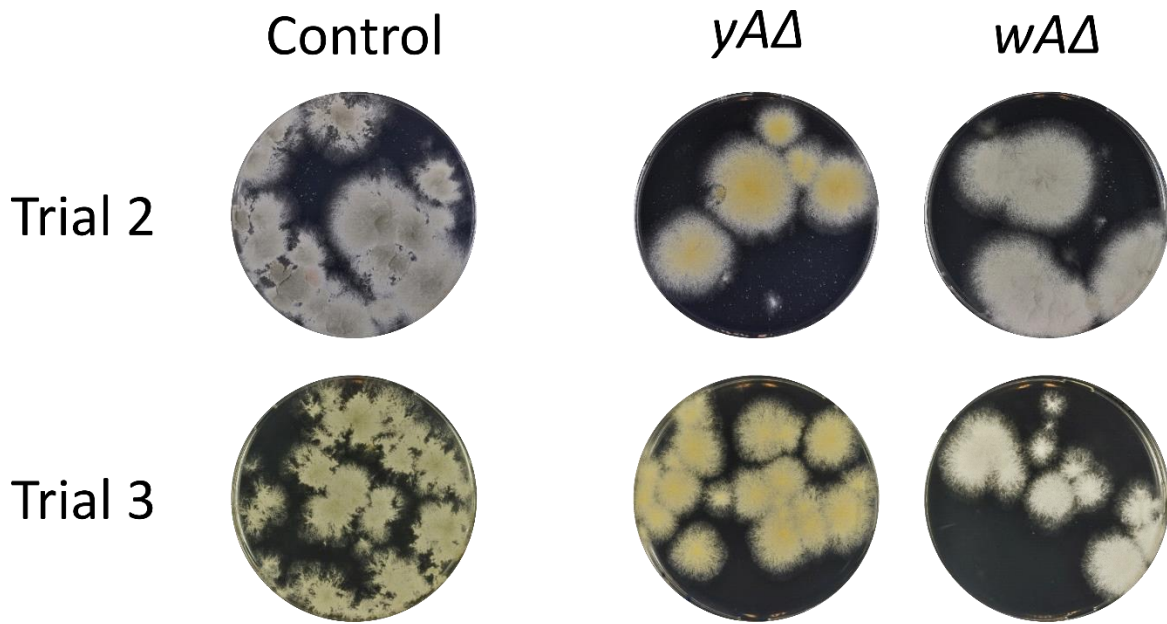

**Supplementary Figure S5** *E. coli* cloning-free gene deletion mediated by *in vivo* assembly. NID1 was transformed with plasmid pAC572 (control) or three PCR fragments: one that contains the *pyrG* marker and two that contain 1000 bp of up- and downstream sequences of *yA* ( $yA\Delta$ ) or up- and downstream sequences of *wA* ( $wA\Delta$ ). Shown are the results of trial 2 and 3 (for trial 1, see main text).

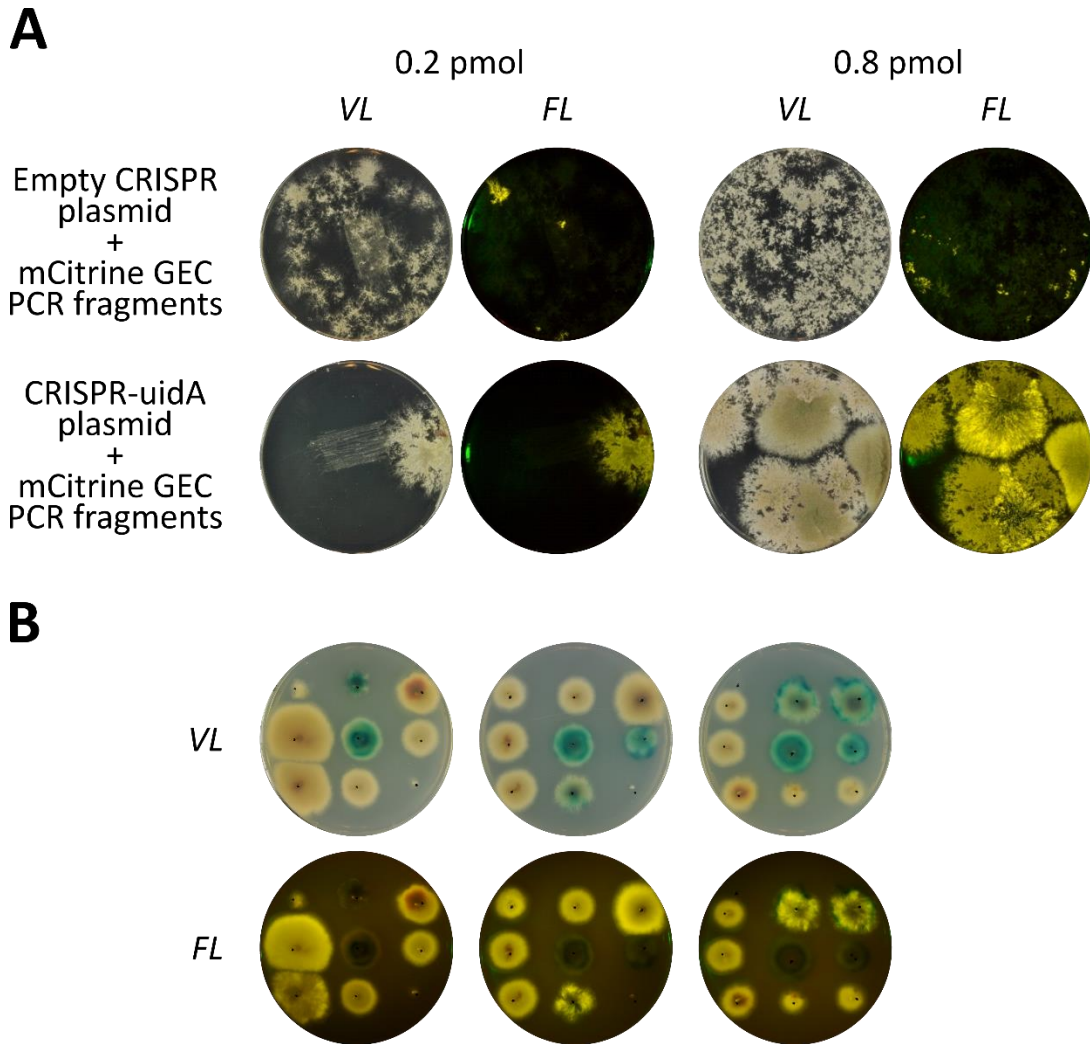

**Supplementary Figure S6** Marker-free chromosomal integration of a *mCitrine*-GEC cassette by *in vivo* assembly. NID2695 contains an artificial insertion site for gene expression, COSI-1 (1). COSI-1 contains the color marker *uidA*. In our system, a GEC is inserted into COSI-1 at the expense of *uidA*. Hence, correct targeting of COSI-1 in NID2695 changes its color from blue to white on X-Gluc plates. **(A)** Transformation of NID2695 with five PCR fragments, which assemble *in vivo* into an *mCitrine*-GEC for targeting into the artificial COSI-1 site, along with an empty CRISPR plasmid pFC330 (top) or with a CRISPR vector encoding an sgRNA targeting Cas9 to *uidA* site, pDIV073 (bottom). In one trial (left) 0.2 pmol of each PCR fragment was used for transformation, and in second trial (right) the amount was increased to 0.8 pmol. Colonies on solid medium were imaged by visible light (VL) and in a setup detecting yellow fluorescence (FL). **(B)** *A. nidulans* strains expressing *mCitrine*-GEC on X-Gluc media. The randomly selected colonies were transferred to solid MM media containing X-Gluc. In the middle of each plate, a control NID2695 strain expressing functional *uidA* gene, but not *mCitrine*, was positioned for comparison. Plates were imaged at white light (VL) and in a setup detecting yellow fluorescence (FL). White colonies which



also has yellow fluorescence signal represent the successful replacement of *uidA* by *mCitrine*-GEC. Blue colonies with no fluorescence signal represent the colonies in which *mCitrine*-GEC was not integrated into the *uidA* locus. Blue colonies with fluorescence signal represent heterokaryons.

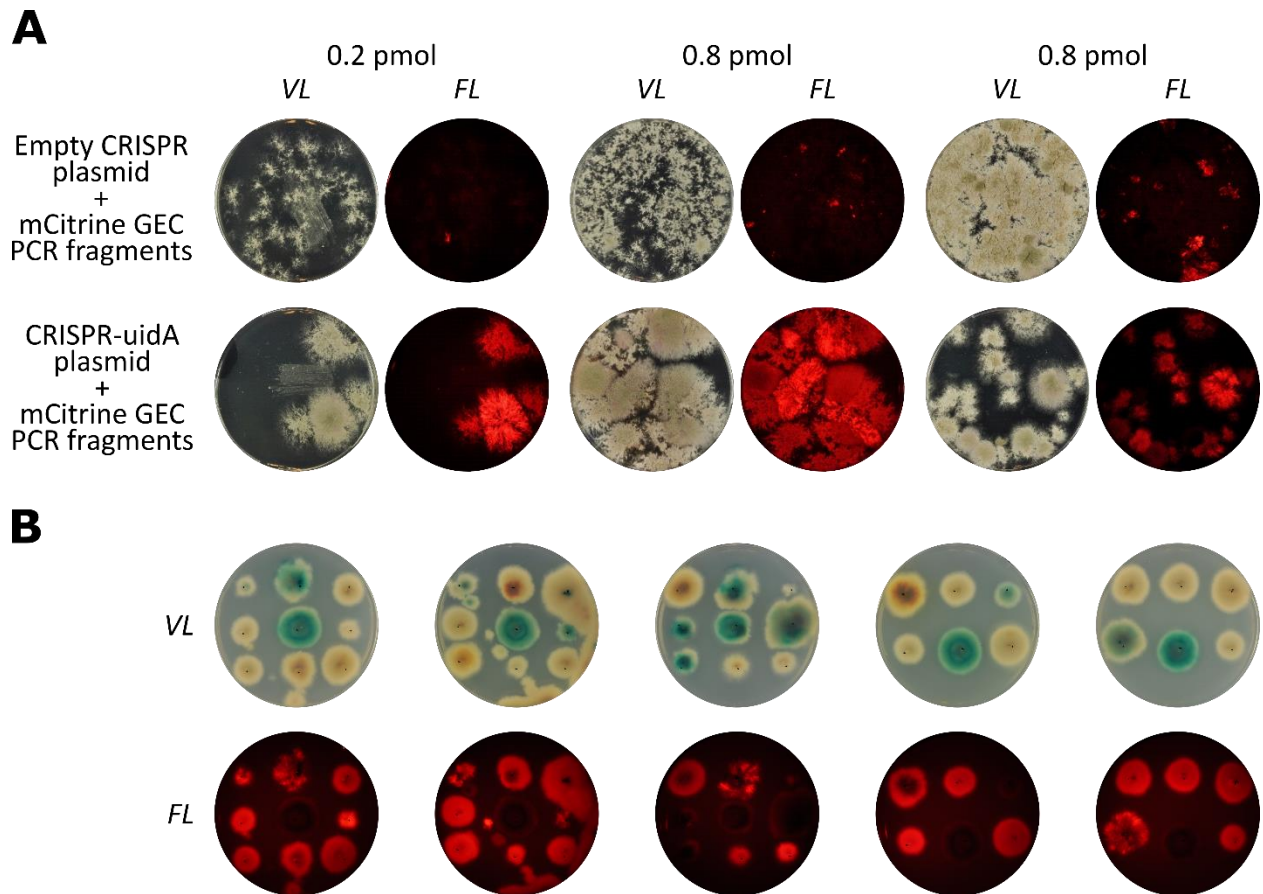

**Supplementary Figure S7** Marker-free chromosomal integration of a *mRFP*-GEC cassette by *in vivo* assembly. **(A)** Transformation of NID2695 with five PCR fragments, which assemble *in vivo* into an *mRFP*-GEC for targeting into the artificial COSI1-1 (1) site containing *uidA*, along with an empty CRISPR plasmid pFC330 (top) or with a CRISPR vector encoding an sgRNA targeting Cas9 to *uidA* site, pDIV073 (bottom). In one trial (left) 0.2 pmol of each PCR fragment was used for transformation, and in second and third trials (middle and right) the amount was increased to 0.8 pmol. Colonies on solid medium were imaged by visible light (VL) and in a setup detecting red fluorescence (FL). **(B)** *A. nidulans* strains expressing *mRFP*-GEC on X-Gluc media. The randomly selected colonies were transferred to solid MM media containing X-Gluc. In the middle of each plate (or middle of the bottom row for two plates on the right), a control NID2695 strain expressing the *uidA* gene, but not expressing *mRFP*, was positioned for comparison. Plates were imaged at white light (VL) and in a setup detecting red fluorescence (FL). White colonies which also has red fluorescence signal represent the successful replacement of *uidA* by *mRFP*-GEC. Blue colonies with no fluorescence signal represent the colonies in which *mRFP*-GEC was not integrated into the *uidA* locus. Blue colonies with fluorescence signal represent heterokaryons.

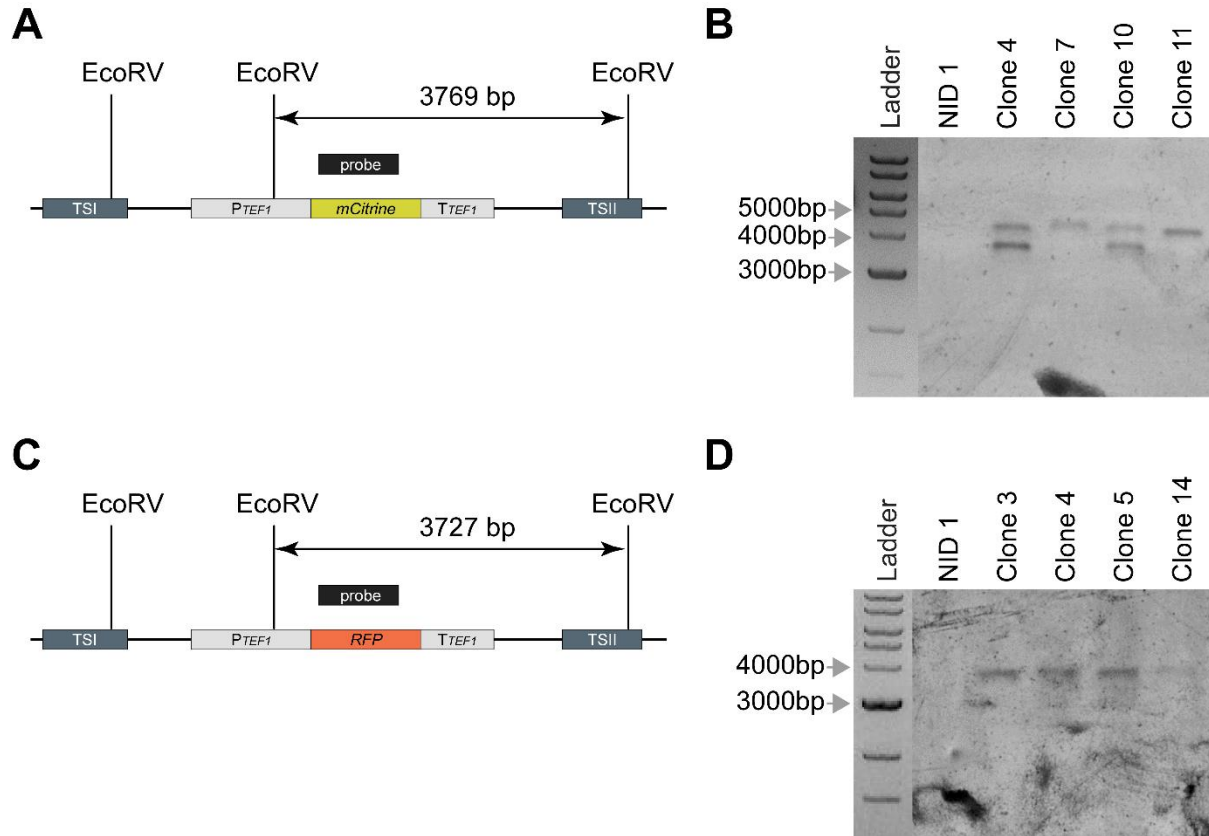

**Supplementary Figure S8** Southern blots of GEC insertion strains generated by *in vivo* assembly. **(A)** Schematic representation of the *mCitrine* gene inserted into COSI-1. Positions of the EcoRV cut sites and of the detection probe are indicated. **(B)** A reference NID1 strain and four random colonies were analyzed for integration of the *mCitrine* gene into COSI-1. Genomic DNA was purified and digested with EcoRV and then analyzed by Southern blotting. **(C)** Schematic representation of the *mRFP* gene inserted into COSI-1. Positions of the EcoRV cut sites and of the detection probe are indicated. **(D)** A reference NID1 strain and four random colonies were analyzed for integration of the *mRFP* gene into COSI-1. Genomic DNA was purified and digested with EcoRV and then analyzed by Southern blotting.

**A**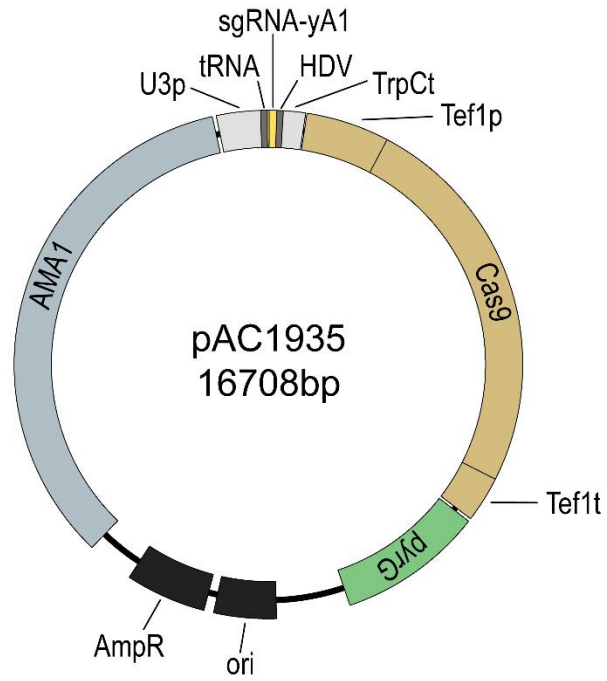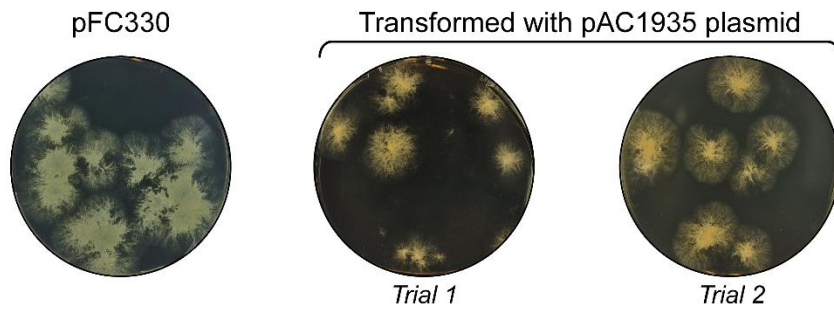**B**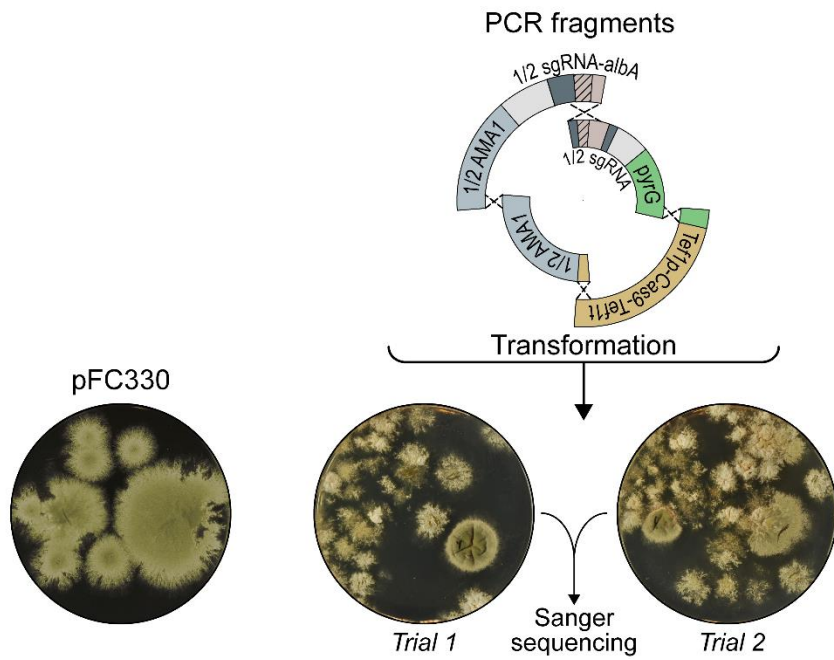

**Supplementary Figure S9** Validation of the tRNA::sgRNA::HDV setup for sgRNA release. **(A)** To demonstrate functionality of the tRNA::sgRNA::HDV cassette, we transformed NID1 strain with pFC330, an empty CRISPR vector (left) and with pAC1935 (*tRNA::yA1-sgRNA::HDV* vector) along with the repair oligonucleotide GE-Oligo1 (right). pAC1935 produces Cas9 and an efficient sgRNA targeting *yA*. The resulting DNA DSB in *yA* can be repaired by GW-Oligo1. If so, a non-sense mutation is introduced into *yA* changing conidia color from green to yellow, for details concerning the sgRNA and GW-Oligo1, see (2). Based on the two experiments, we judge the mutation efficiency is > 90%. **(B)** Construction of a *tRNA::albA-sgRNA::HDV* ESF-CRISPR vector in NID1 strains by *in vivo* assembly. NID1 was transformed with an empty CRISPR plasmid pFC330 (left) or the four different PCR fragments required for *albA* ESF-CRISPR plasmid assembly (right). Note the *albA-sgRNA* does not have a target sequence in the *A. nidulans* genome, but rather matches *albA* in *A. aculeatus*. Hence, it does not introduce toxic DNA DSBs in *A. nidulans* and the number of transformants therefore reflect the efficiency of the assembly process. Three transformants were randomly selected for sequence analysis. In all three cases, the sgRNA expression cassette was correctly assembled.

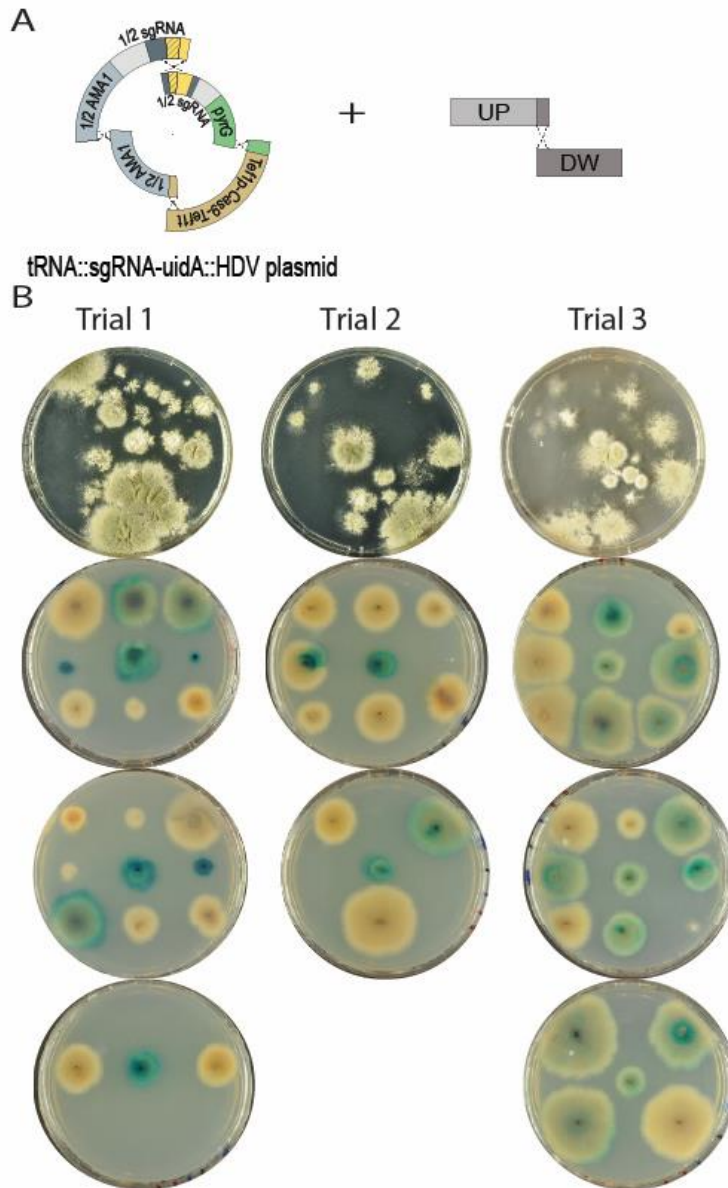

**Supplementary Figure S10** Cloning- and marker-free gene deletion by *in vivo* assembly. **(A)** *in vivo* assembly of the ESF-CRISPR plasmid, and in parallel, *in vivo* assembly of a gene-targeting substrate for marker-free deletion of *uidA* in COSI-1 (1). **(B)** All PCR fragments shown in (A) were co-transformed, in three trials, into NID2695. All transformants from each trial were transferred to solid MM media containing X-Gluc. In the middle of each plate, a control strain NID2695 expressing the *uidA* gene was positioned for comparison. White colonies indicate a successful marker-free deletion of the *uidA* gene in COSI-1 using the gene-targeting substrate assembled by *in vivo* fusion of two PCR fragments for repair.

**Supplementary Table S1** Vectors used in this study.

| Plasmid ID                                                                          | Description <sup>a</sup>                                                                                  | Purpose                                                              | Reference  |
|-------------------------------------------------------------------------------------|-----------------------------------------------------------------------------------------------------------|----------------------------------------------------------------------|------------|
| pAC1767                                                                             | <i>An_argB</i> -AMA1:: <i>uidA</i> -5' <i>tr</i>                                                          | For gap repair assay                                                 | This study |
| pAC1688                                                                             | <i>An_argB</i> -AMA1:: <i>uidA</i>                                                                        | Control vector for gap repair experiments                            | This study |
| pDIV083                                                                             | UP( <i>An</i> )-A- <i>An_PgpdA</i> - <i>uidA</i> - <i>An_TtrpC</i> -B-DW( <i>An</i> )                     | Vector for amplification of <i>PgpdA-uidA-TtrpC</i>                  | (1)        |
| pAC573                                                                              | <i>An_argB</i> -AMA1::PacI/Nt.BbvCI                                                                       | Vector for constructing pAC1688 and control vector for AMA1 assembly | (2)        |
| pAC572                                                                              | <i>Af_pyrG</i> -AMA1::PacI/Nt.BbvCI                                                                       | Control vector for AMA1 assembly and gene deletions                  | (2)        |
| pDIV088                                                                             | A- <i>An_PgpdA</i> - <i>mCitrine</i> - <i>An_TtrpC</i> -B                                                 | Template for Southern blot probe                                     |            |
| pDIV089                                                                             | A- <i>An_PgpdA</i> - <i>mRFP</i> - <i>An_TtrpC</i> -B                                                     | Template for Southern blot probe                                     | (1)        |
| pFC330                                                                              | <i>Af_pyrG</i> -AMA1::PacI/Nt.BbvCI- <i>cas9</i>                                                          | Control vector for GEC integrations                                  | (3)        |
| pDIV073                                                                             | pFC330:: <i>uidA</i> - <i>gRNA2</i>                                                                       | Cas9 vector for GEC integrations                                     | (1)        |
| pAC1935                                                                             | <i>cas9</i> - <i>Af_pyrG</i> -AMA1:: <i>Af_U3p</i> - <i>tRNA-γA</i> - <i>sgRNA1</i> -HDV- <i>An_TtrpC</i> | Cas9 vector for <i>γA1</i> targeting                                 | This study |
| <sup>a</sup> An – <i>Aspergillus nidulans</i> ; Af – <i>Aspergillus fumigatus</i> . |                                                                                                           |                                                                      |            |

**Supplementary Table S2** Strains used in this study.

| Strain ID <sup>a</sup> | Genotype                                                     | Purpose                           | Reference |
|------------------------|--------------------------------------------------------------|-----------------------------------|-----------|
| NID1                   | <i>veA1, argB2, pyrG89, nkuAΔ</i>                            | Gap repair assays; gene deletions | (4)       |
| NID5                   | <i>veA1, argB2, pyrG89</i>                                   | Gap repair assays                 | IBT 27263 |
| NID2695                | <i>veA1, argB2, pyrG89, nkuAΔ, IS1::A-PgpdA-uidA-TtrpC-B</i> | AMA1 assembly; GEC integration    | (1)       |
| ACU59                  | <i>pyrG1, akuAΔ, IS1::A-PgpdA-uidA-TtrpC-B</i>               | AMA1 assembly; GEC integration    | (1)       |
| NIG158                 | <i>pyrG1, kusAΔ, IS1::A-PgpdA-uidA-TtrpC-B</i>               | AMA1 assembly; GEC integration    | (1)       |
| ORY7                   | <i>pyrGΔ, ku70Δ, IS1::A-PgpdA-uidA-TtrpC-B</i>               | AMA1 assembly; GEC integration    | (1)       |

<sup>a</sup> NID – *Aspergillus nidulans*; ACU – *Aspergillus aculeatus*; NIG – *Aspergillus niger*; ORY – *Aspergillus oryzae*.



**Supplementary Table S3** List of primers used in this study.

| Primer ID                                                                                         | Sequence <sup>a</sup> 5' → 3'                                               | Purpose <sup>b</sup>                                                    |
|---------------------------------------------------------------------------------------------------|-----------------------------------------------------------------------------|-------------------------------------------------------------------------|
| <b>Primers for fragment amplification with increasing ends-out homologies in gap repair assay</b> |                                                                             |                                                                         |
| ZJ142                                                                                             | GGGTTAAUATTCCCTTGTATCTCTACACACAGG                                           | To amplify a USER cloning compatible <i>uidA</i> reporter gene cassette |
| ZJ428                                                                                             | GGTCTTAAUGGGCGCTTACACAGTACACG                                               | To amplify a USER cloning compatible <i>uidA</i> reporter gene cassette |
| C407                                                                                              | GCCATTAACTAGGTACAGAAGTC                                                     | To construct 25 bp homology overhang fragment                           |
| C408                                                                                              | TGATCGTTAAAAGTGCCTGGC                                                       | To construct 25 bp homology overhang fragment                           |
| C409                                                                                              | GTGTATAGCCGTCGGCGAAATAG                                                     | To construct 50 bp homology overhang fragment                           |
| C410                                                                                              | ATTACGAATATCTGCATCGGCGAAC                                                   | To construct 50 bp homology overhang fragment                           |
| C411                                                                                              | GAGCTTCATCGAATCACCGG                                                        | To construct 100 bp homology overhang fragment                          |
| C412                                                                                              | CAACCTTTCGGTATAAAGACTTCGC                                                   | To construct 100 bp homology overhang fragment                          |
| C413                                                                                              | GATGATTATAATCCGGGACCGG                                                      | To construct 200 bp homology overhang fragment                          |
| C414                                                                                              | CGTATAGCCGCCCTGATG                                                          | To construct 200 bp homology overhang fragment                          |
| C415                                                                                              | CTGGAGTGACCCAGAGGG                                                          | To construct 400 bp homology overhang fragment                          |
| C416                                                                                              | GTGGGTAGAGCATTACGCTG                                                        | To construct 400 bp homology overhang fragment                          |
| C417                                                                                              | TAAATCAGGAGATATAGCATGATCTCTAG                                               | To construct 800 bp homology overhang fragment                          |
| C418                                                                                              | CACCATCAGCACGTTATCGAATC                                                     | To construct 800 bp homology overhang fragment                          |
| C419                                                                                              | TTTCGACACTGAAATACGTCGAG                                                     | To construct 1600 bp homology overhang fragment                         |
| C420                                                                                              | GACTTCGGTTTGC GGTCG                                                         | To construct 1600 bp homology overhang fragment                         |
| <b>Primers for AMA1 plasmid assembly</b>                                                          |                                                                             |                                                                         |
| PR_DIV1387                                                                                        | GAACCAGAAAGGCAAGGCAG                                                        | Amplification of I half of AMA1                                         |
| PR_DIV1390                                                                                        | TGAGGTCTTAATTAACCCCTCAGC                                                    | Amplification of I half of AMA1                                         |
| PR_DIV1395                                                                                        | AAGATCTCATGGTCATAGCTGTTTCCGCTGAGGGTTTAATTAAGACCTCAATTCCCTTGTATCTCTACACACAGG | Amplification of ANP <i>gpdA</i> with 50 bp overhang                    |
| PR_DIV1396                                                                                        | GCGGTAGTGATGTCTGCTCAA                                                       | Amplification of ANP <i>gpdA</i>                                        |
| PR_DIV1397                                                                                        | CATCGCAGCTTGACTAACAGCTACCCCGCTTGAGCAGACATCACTACCGCATGGTGAGCAAGGGCGAG        | Amplification of <i>mCitrine</i> with 50 bp overhang                    |
| PR_DIV1398                                                                                        | TATCCAGATCGTCAAGCTGTTTGATGATTTCAAGTAAAGTGGATCCCTTACTTGATCAGCTCGTCCATGC      | Amplification of <i>mCitrine</i> with 50 bp overhang                    |
| PR_DIV1399                                                                                        | GGATCCACTTAACGTTACTGAAATC                                                   | Amplification of ANT <i>trpC</i>                                        |
| PR_DIV1400                                                                                        | CTGCGTCCGGGTCTGTTTCATTAGATGACTACCCCAAAAAACCGCGGAATGGGCGCTTACACAGTACACG      | Amplification of ANT <i>trpC</i> with 50 bp overhang                    |
| PR_DIV1401                                                                                        | ATTCGCGGTTTTTTGGG                                                           | Amplification of AN P- <i>argB</i> -T                                   |
| PR_DIV1402                                                                                        | TACGCGTTAAGCTTGGCACTGGCCGTCACTGCTTCGTCGATTAAACCTACCTACAGCCATTGCGAAACC       | Amplification of AN P- <i>argB</i> -T with 50 bp overhang               |
| PR_DIV1389                                                                                        | AGGGTTAATCGACGAAGCAG                                                        | Amplification of II half of AMA1                                        |
| PR_DIV1388                                                                                        | ATCACTTCCAACACTCTTGCTGA                                                     | Amplification of II half of AMA1                                        |
| PR_DIV1391                                                                                        | AAGATCTCATGGTCATAGCTGTTTCCGCTGAGGGTTTAATTAAGACCTCAGAGACAGCAGAATCACCGC       | Amplification of ANP <i>TEF1</i> with 50 bp overhang                    |

|                                               |                                                                               |                                                           |
|-----------------------------------------------|-------------------------------------------------------------------------------|-----------------------------------------------------------|
| PR_DIV1390                                    | TGAGGTCTTAATTAACCCCTCAGC                                                      | Amplification of ANPTEF1                                  |
| PR_DIV1348                                    | CTGAGCACTTCTCCCTTTTATATTCCACAAAACATAACACAACCTTCACCATGGCCTCCTC<br>CGAGGAC      | Amplification of <i>mRFP</i> with 50 bp overhang          |
| PR_DIV1349                                    | TCGTAAAGGCTTTTTAAGGAAGTCATAACGGCATAAATCGAATGTCGGCTTAGGCGCC<br>GGTGGAGT        | Amplification of <i>mRFP</i> with 50 bp overhang          |
| PR_DIV430                                     | GCGGACATTCGATTTATGCC                                                          | Amplification of ANTTEF1                                  |
| PR_DIV1392                                    | CCCCGCCGGGTACCGAGCTCGAATTCGTAATCATGTCATATTACCTAGTGTATTGGGA<br>TGAATTTGTATGCAC | Amplification of ANTTEF1 with 50 bp overhang              |
| PR_DIV1393                                    | ACTAGGTAATATGACATGATTACGAATTC                                                 | Amplification of AF P- <i>pyrG</i> -T                     |
| PR_DIV1394                                    | TACGCGTTAAGCTTGGCACTGGCCGTCAGCTGCTTCGTCGATTAAACCTAGTGGGGAT<br>GCCTCAATTGT     | Amplification of AF P- <i>pyrG</i> -T with 50 bp overhang |
| <b>Primers for gene integrations</b>          |                                                                               |                                                           |
| PR_DIV432                                     | AGGTGTAAGTAGGGAGCGGTAG                                                        | Amplification of A                                        |
| PR_DIV1344                                    | TCACTGTCCGCTTGACAGAGT                                                         | Amplification of A                                        |
| PR_DIV1346                                    | TTGGTGGGTAAAGTCTGGCAGGTACCGTCCACTCTGCAAGCGGACAGTGACGAGACAG<br>CAGAATCACCGC    | Amplification of ANPTEF1 with 50 bp overhang              |
| PR_DIV427                                     | GGTGAAGTTGTGTTATGTTTTGTG                                                      | Amplification of ANPTEF1                                  |
| PR_DIV1350                                    | CTGAGCACTTCTCCCTTTTATATTCCACAAAACATAACACAACCTTCACCATGGTGAGCA<br>AGGGCGAG      | Amplification of <i>mCitrine</i> with 50 bp overhang      |
| PR_DIV1351                                    | TCGTAAAGGCTTTTTAAGGAAGTCATAACGGCATAAATCGAATGTCGGCTTACTTGTAC<br>AGCTCGTCCATGC  | Amplification of <i>mCitrine</i> with 50 bp overhang      |
| PR_DIV430                                     | GCGGACATTCGATTTATGCC                                                          | Amplification of ANTTEF1                                  |
| PR_DIV1347                                    | GGGAGCTAGGTATTCCTTCGGTAGAAGTAGCAGGAGTAGCGTACATAGGTATTGGG<br>ATGAATTTGTATGCAC  | Amplification of ANTTEF1 with 50 bp overhang              |
| PR_DIV1345                                    | CCTATGTACGCTACTCTGCTACT                                                       | Amplification of B                                        |
| PR_DIV435                                     | GAGGAGAGTGGATGGATAGTCTGG                                                      | Amplification of B                                        |
| PR_DIV1348                                    | CTGAGCACTTCTCCCTTTTATATTCCACAAAACATAACACAACCTTCACCATGGCCTCCTC<br>CGAGGAC      | Amplification of <i>mRFP</i> with 50 bp overhang          |
| PR_DIV1349                                    | TCGTAAAGGCTTTTTAAGGAAGTCATAACGGCATAAATCGAATGTCGGCTTAGGCGCC<br>GGTGGAGT        | Amplification of <i>mRFP</i> with 50 bp overhang          |
| <b>Primers for gene deletions</b>             |                                                                               |                                                           |
| C606                                          | CGTGGAGTTACCAGTGATTG                                                          | Amplification of AF P- <i>pyrG</i> -T                     |
| C607                                          | CTAGATGACTGGTAGGAATCTAAC                                                      | Amplification of AF P- <i>pyrG</i> -T                     |
| C608                                          | CGGACCTGACAATTCTCGACG                                                         | Amplification of ANY $\Delta$ TSI                         |
| C610                                          | AGGCAGAAGCTGAGAAGATAAAACATTGGTCAATCACTGGTAACTCCACGGCTGGATCC<br>CGGAGGAATC     | Amplification of ANY $\Delta$ TSI with 50 bp overhang     |
| C612                                          | CCCCAATCGTCAAGGTTTTCCCTTTGTTAGATTCTACCAGTCATCTAGGGTGAGCTCTC<br>ATATTCGTAATTAC | Amplification of ANY $\Delta$ TSII with 50 bp overhang    |
| C613                                          | CCGTCAAACACTGCATCGG                                                           | Amplification of ANY $\Delta$ TSII                        |
| C614                                          | CTCTGGAACAGTCTCGCC                                                            | Amplification of ANw $\Delta$ TSI                         |
| C616                                          | AGGCAGAAGCTGAGAAGATAAAACATTGGTCAATCACTGGTAACTCCACGGATCAGGA<br>GAAGGAGAGTCAAG  | Amplification of ANw $\Delta$ TSI with 50 bp overhang     |
| C618                                          | CCCCAATCGTCAAGGTTTTCCCTTTGTTAGATTCTACCAGTCATCTAGGGCAAAGGAG<br>CTTGCTACTTTC    | Amplification of ANw $\Delta$ TSII with 50 bp overhang    |
| C619                                          | AAGCCGACACCTGACTCG                                                            | Amplification of ANw $\Delta$ TSII                        |
| <b>For construction of pAC1935</b>            |                                                                               |                                                           |
| oKST_83                                       | ACCCCAAUGGAAACGGTGAGAGTCCA                                                    | AMA FW                                                    |
| oKST_289                                      | AAGTTGAUACGGACTAGCCTTATTTTAAAC                                                | traRNA sgRNA backbone RV primer                           |
| oKST_288                                      | ATCAACTUGAAAAAGTGGCACCGAGTC                                                   | traRNA sgRNA backbone FW primer                           |
| oKST_230                                      | ACTGTTCTUCTAGTGTAGCCGTAGTTAGC                                                 | int Ori USER RV                                           |
| oKST_229                                      | AAGAACAGUATTTGGTATCTGCGCTCTG                                                  | int Ori USER FW                                           |
| oKST_82                                       | ATTGGGGUACTAACATAGCCATCAAATGC                                                 | AMA RV                                                    |
| <b>ESF-CRISPR alba test vector bio-blocks</b> |                                                                               |                                                           |

|                                                                                          |                                                                                |                                                             |
|------------------------------------------------------------------------------------------|--------------------------------------------------------------------------------|-------------------------------------------------------------|
| oKST_335                                                                                 | CAGTCATCTAGCAAGGCGGCCGACGCTAGCACAAATTGAGGCATCCCCACTCGAGACAG<br>CAGAATCACCGC    | FW ANTTEF1 with 50 bp HR to AF<br>P-pyrG-T                  |
| oKST_337                                                                                 | TACGCGTTAAGCTTGGCACTGGCCGTACGCTGCTTCGTGCGATTAAACCCGTATTGGGA<br>TGAATTTGTATGCAC | RV ANTTEF1 50 bp HR AMA part 1                              |
| PR_DIV1389                                                                               | AGGGTTTAATCGACGAAGCAG                                                          | Amplification of II half of AMA1                            |
| PR_DIV1388                                                                               | ATCACTTCCAACACTCTTGCTGA                                                        | Amplification of II half of AMA1                            |
| PR_DIV1387                                                                               | GAACCAGAAAGGCAAGGCAG                                                           | Amplification of I half of AMA1                             |
| oKST_330                                                                                 | GCTATTTCTAGCTCTAAAACCGATTCTCAACATGTCGCCGTCATCATCCGTGAATCGAA                    | 60 bp overhang with ACU <i>albA</i><br>sgRNA RV             |
| oKST_329                                                                                 | TTCGATTCACGGATGATGCAAGCGACATGTTGAAGAATCGGTTTTAGAGCTAGAAAATA<br>GC              | 60 bp overhang ACU <i>albA</i> sgRNA<br>FW                  |
| oKST_336                                                                                 | AGTGGGGATGCCTCAATTGT                                                           | P-pyrG-T Rv                                                 |
| <b><i>uidA</i> deletion, ESF-CRISPR vector expressing an sgRNA targeting <i>uidA</i></b> |                                                                                |                                                             |
| oKST_356                                                                                 | TTCGATTCACGGATGATGCAAGCGACGATCGGACGCGTCGTTTTAGAGCTAGAAAATA<br>GC               | 60 bp overhang with <i>uidA</i> sgRNA<br>FW                 |
| oKST_357                                                                                 | GCTATTTCTAGCTCTAAAACGACGCGTCCGATCACCTGCGTGCATCATCCGTGAATCGAA                   | 60 bp overhang with <i>uidA</i> sgRNA<br>RV                 |
| oKST_358                                                                                 | GGTCGCGGAGTTCATAATCG                                                           | FW IS1-A repair                                             |
| oKST_359                                                                                 | TCACTGTCCGCTTGCAGAG                                                            | RV IS1-A repair                                             |
| oKST_360                                                                                 | TTGGTGGGTAAAGTCTGGCAGGTACCGTCCACTCTGCAAGCGGACAGTGATCCTATGTA<br>CGCTACTCCTG     | FW B-IS1 repair with 50 bp overlap<br>to A                  |
| oKST_361                                                                                 | TAGGATTGAGATTGCAATACCC                                                         | RV B-IS1 repair                                             |
| <b>Primers for diagnostic PCR and sequencing</b>                                         |                                                                                |                                                             |
| C413                                                                                     | GATGATTATAATCCGGACCGG                                                          | Amplification & sequencing of blue<br>gap repair colonies   |
| C414                                                                                     | CGTATAGCCGCCTGATG                                                              | Amplification & sequencing of blue<br>gap repair colonies   |
| PR_DIV1745                                                                               | GCTTGAGAGGGCACGTATGG                                                           | Amplification of AMA1 plasmids                              |
| CSN37                                                                                    | TTTATCTGTTGTGCCACAGTCTC                                                        | Amplification of <i>yAD</i> locus                           |
| M91                                                                                      | GTAACCTCTGTCGCATCTG                                                            | Amplification of <i>yAD</i> locus                           |
| PR_DIV1751                                                                               | CCAGATGATGGCTCAGGCA                                                            | Amplification of <i>wAD</i> locus                           |
| M87                                                                                      | CACTCTGGAAACGAACTC                                                             | Amplification of <i>wAD</i> locus                           |
| J43                                                                                      | GGACAACGGGAAGAGGCTCAG                                                          | Amplification of mCitrine or RFP in<br>AN <i>uidA</i> locus |
| J44                                                                                      | GGAGAGGGAGAGAAGAAGAGGG                                                         | Amplification of mCitrine or RFP in<br>AN <i>uidA</i> locus |
| PR_DIV341                                                                                | GCATTCCAAGTATTGAACCTTCTC                                                       | Amplification of RFP in ACU <i>uidA</i><br>locus            |
| PR_DIV342                                                                                | GATGTCTCGCACGAGTCCAGT                                                          | Amplification of RFP in ACU <i>uidA</i><br>locus            |
| ZJ79                                                                                     | GTTCCACGGGAGGTGTGAATC                                                          | Amplification of RFP in ASN <i>uidA</i><br>locus            |
| ZJ96                                                                                     | CTGTGTGACTGGTAGGTTCTGAGTG                                                      | Amplification of RFP in ASN <i>uidA</i><br>locus            |
| PR_DIV1127                                                                               | GCAGTTTGGGTGTGGTGTT                                                            | Amplification of RFP in AO <i>uidA</i><br>locus             |
| PR_DIV1128                                                                               | GAGTGGGTTAATGTTGCGTCG                                                          | Amplification of RFP in AO <i>uidA</i><br>locus             |
| EDR08                                                                                    | CAAGTCAGCCAACGCAACACAG                                                         | Sequencing of AMA1-mCitrine<br>plasmids                     |
| CSN46                                                                                    | TGCGTCAGTCCAACATTTGT                                                           | Sequencing of AMA1-mCitrine<br>plasmids                     |
| PR_DIV1748                                                                               | GCATCAAGGTGAACTTCAAGATC                                                        | Sequencing of AMA1-mCitrine<br>plasmids                     |
| CSN159                                                                                   | CCTATGAGTCGTTTACCCAG                                                           | Sequencing of AMA1-mCitrine<br>plasmids                     |
| ZJ301                                                                                    | GGTTTCGTTGTCAATAAGGGAA                                                         | Sequencing of AMA1-mCitrine<br>plasmids                     |

|                                                                                                                                                                                                                                                                                                                                                                |                           |                                                                     |
|----------------------------------------------------------------------------------------------------------------------------------------------------------------------------------------------------------------------------------------------------------------------------------------------------------------------------------------------------------------|---------------------------|---------------------------------------------------------------------|
| oKST_72                                                                                                                                                                                                                                                                                                                                                        | TGCTCGGAATCCATATTG        | Sequencing of AMA1-RFP plasmids and integration of mCitrine/RFP-GEC |
| CSN364                                                                                                                                                                                                                                                                                                                                                         | CTTCTCTGCTCAGCACCTCTACG   | Sequencing of AMA1-RFP plasmids and integration of mCitrine/RFP-GEC |
| PR_DIV482                                                                                                                                                                                                                                                                                                                                                      | CCAATGCGCGATTCAAGAC       | Sequencing of AMA1-RFP plasmids and integration of mCitrine/RFP-GEC |
| CSN42                                                                                                                                                                                                                                                                                                                                                          | TGTAGTGCCAGTACGAGTGTTGTG  | Sequencing of AMA1-RFP plasmids                                     |
| CSN451                                                                                                                                                                                                                                                                                                                                                         | CGACAACCAAGGGAAGTCAACA    | Sequencing of of <i>yAΔ</i> locus                                   |
| A262                                                                                                                                                                                                                                                                                                                                                           | GGCTGGGAGGGTCAGAGG        | Sequencing of of <i>yAΔ</i> locus                                   |
| CSN592                                                                                                                                                                                                                                                                                                                                                         | CTTGCCGATGCTACATTGCCT     | Sequencing of of <i>wAΔ</i> locus                                   |
| PR_DIV1752                                                                                                                                                                                                                                                                                                                                                     | GCTGAACACTTAGATGCAGTCTCTC | Sequencing of of <i>wAΔ</i> locus                                   |
| MF233                                                                                                                                                                                                                                                                                                                                                          | AGGTTCTCCTAACGCTTGGC      | Sequencing of <i>AFPU3</i>                                          |
| oKST_110                                                                                                                                                                                                                                                                                                                                                       | TGATCCACAGCGTCAAGA        | Sequencing of <i>ANPTEF1</i>                                        |
| oKST_352                                                                                                                                                                                                                                                                                                                                                       | CCCGAAACGCGTTTTATTCTTG    | Sequencing <i>ANTTRPC</i>                                           |
| oKST_358                                                                                                                                                                                                                                                                                                                                                       | GGTCGCGGAGTTCATAATCG      | FW IS1-A repair                                                     |
| oKST_361                                                                                                                                                                                                                                                                                                                                                       | TAGGATTGAGATTGCAATACCC    | RV B-IS1 repair                                                     |
| <b>Primers for Southern blot probe design</b>                                                                                                                                                                                                                                                                                                                  |                           |                                                                     |
| PR_DIV1428                                                                                                                                                                                                                                                                                                                                                     | CGTCATCAAGGAGTTCATGC      | mRFP1_probe-F                                                       |
| PR_DIV1429                                                                                                                                                                                                                                                                                                                                                     | CTCGTTGTGGGAGGTGATGT      | mRFP1_probe-R                                                       |
| PR_DIV0226                                                                                                                                                                                                                                                                                                                                                     | GTAACGGCCACAAGTTCAGC      | mCitrine_probe-F                                                    |
| PR_DIV0227                                                                                                                                                                                                                                                                                                                                                     | GTAGTGGTTGTCGGGCAGC       | mCitrine_probe-R                                                    |
| <sup>a</sup> Color code: annealing sequence, <b>overhangs</b> , <b>protospacer sequence</b> , <b>thymine-&gt; uracil substitution</b> .<br><sup>b</sup> AN – <i>Aspergillus nidulans</i> ; AF – <i>Aspergillus fumigatus</i> ; TS – targeting sequence; ACU – <i>Aspergillus aculeatus</i> ; ASN – <i>Aspergillus niger</i> ; AO – <i>Aspergillus oryzae</i> . |                           |                                                                     |

## REFERENCES

1. Jarczynska,Z.D., Rendsvig,J.K.H., Pagels,N., Viana,V.R., Nødvig,C.S., Kirchner,F.H., Strucko,T., Nielsen,M.L. and Mortensen,U.H. (2021) DIVERSIFY: A fungal multispecies gene expression platform. *ACS Synth. Biol.*, **10**, 579–588.
2. Nødvig,C.S., Hoof,J.B., Kogle,M.E., Jarczynska,Z.D., Lehmebeck,J., Klitgaard,D.K. and Mortensen,U.H. (2018) Efficient oligo nucleotide mediated CRISPR-Cas9 gene editing in Aspergilli. *Fungal Genet. Biol.*, **115**, 78–89.
3. Nødvig,C.S., Nielsen,J.B., Kogle,M.E. and Mortensen,U.H. (2015) A CRISPR-Cas9 system for genetic engineering of filamentous fungi. *PLoS One*, **10**, 1–18.
4. Nielsen,J.B., Nielsen,M.L. and Mortensen,U.H. (2008) Transient disruption of non-homologous end-joining facilitates targeted genome manipulations in the filamentous fungus *Aspergillus nidulans*. *Fungal Genet. Biol.*, **45**, 165–170.
